# Supplementary material for: Hydrophobization of Tobacco Mosaic Virus to Control the Mineralization of Organic Templates
Source: Nanomaterials (Basel). 2019 May 24;9(5):800. doi: 10.3390/nano9050800 (PMC6567237; doi:10.3390/nano9050800)
Supplement: Supplementary file 1 [file nanomaterials-09-00800-s001.pdf]

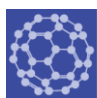

Supplementary Materials

# Hydrophobization of Tobacco Mosaic Virus to Control the Mineralization of Organic Templates

Petia Atanasova <sup>1,\*</sup>, Vladimir Atanasov <sup>2</sup>, Lisa Wittum <sup>3</sup>, Alexander Southan <sup>4</sup>, Eunjin Choi <sup>1</sup>, Christina Wege <sup>3</sup>, Jochen Kerres <sup>2</sup>, Sabine Eiben <sup>3</sup> and Joachim Bill <sup>1</sup>

<sup>1</sup> Institute for Materials Science, University of Stuttgart, Heisenbergstr. 3, 70569 Stuttgart, Germany; choi@is.mpg.de (E.C.); bill@imw.uni-stuttgart.de (J.B.)

<sup>2</sup> Institute of Chemical Process Engineering, University of Stuttgart, Böblinger Straße 78, 70199 Stuttgart, Germany; vladimir.atanasov@icvt.uni-stuttgart.de (V.A.); jochen.kerres@icvt.uni-stuttgart.de (J.K.)

<sup>3</sup> Institute of Biomaterials and Biological Systems, University of Stuttgart, Pfaffenwaldring 57, 70569 Stuttgart, Germany; lisawittum1@yahoo.de (L.W.); christina.wege@bio.uni-stuttgart.de (C.W.); sabine.eiben@gmx.de (S.E.)

<sup>4</sup> Institute of Interfacial Process Engineering and Plasma Technology, University of Stuttgart, Pfaffenwaldring 31, 70569 Stuttgart, Germany; alexander.southan@igvp.uni-stuttgart.de

\* Correspondence: atanasova@imw.uni-stuttgart.de

Received: 24 April 2019; Accepted: 20 May 2019; Published: date

Transmission measurement of 0.02 g ml<sup>-1</sup> PPGA in 10 mM SPP buffer solution has shown a lower critical solution temperature of 7.8 °C, while below 4 °C PPGA was completely soluble. The measured concentration was in the same range as used for coupling to TMV.

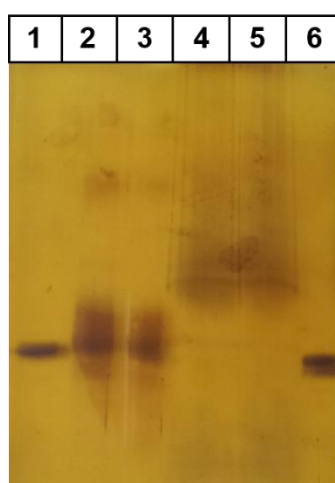

**Figure S1.** SDS-PAGE of samples containing: (1) wt-TMV, (2) TMV-ketone, (3) TMV-ketone after purification with a PD MiniTrap G-25 column, (4) h-TMV, (5) h-TMV after purification with a PD MiniTrap G-25 column and (6) control experiment including reaction of wt-TMV with PE-b-PEG.

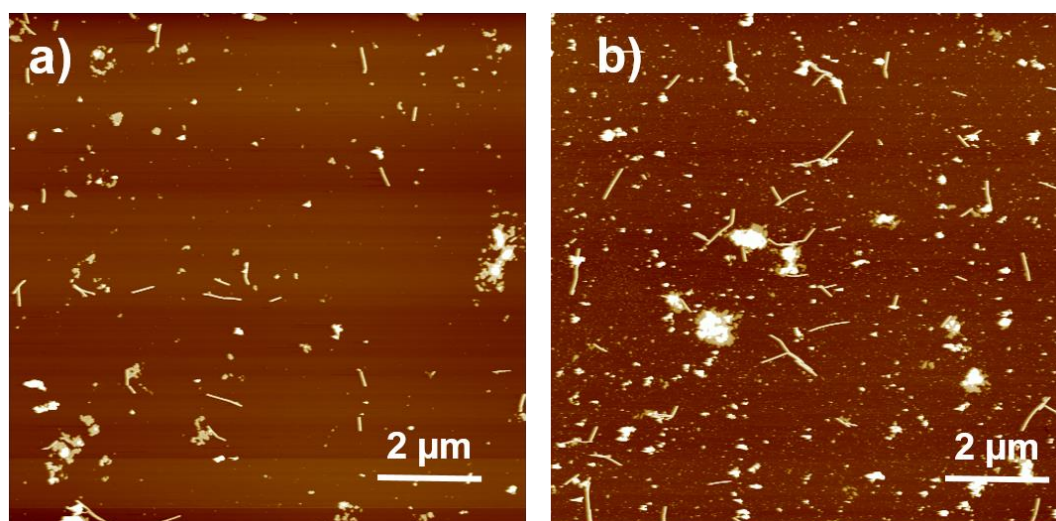

**Figure S2.** Low magnification AFM height images showing the stability of the h-TMV particles: (a) after 30 min stirring in 100 mM  $\text{ZnCl}_2$  precursor solution and (b) after 5 min mineralization with  $\text{ZnS}$ .
